# Supplementary material
Source: PubMed Central journal article supplement (PMC3067307)
Supplement: supp_77_6_2192__2.pdf [file supp_77_6_2192__2.pdf]

**Supplemental Materials (2) to Worrell *et al.* Field Detection of *Schistosoma japonicum* Cercariae in Environmental Water Samples by Quantitative PCR.**

Descriptive and environmental information was collected at each sampling site (Table S2). The majority of water samples were collected from slow moving water (n= 83, 77.5%) in irrigation ditches (n=51, 47.2%). Since this work aimed to compare the current gold standards against our newly developed qPCR technology, the samples were collected only in a narrow range of environmental conditions that were also viable for mouse bioassay deployment (mean water temperature: 22.7°C; mean air temperature: 26.8°C). The distribution of characteristics of sampling site variables, water speed and site location, among positive and negative samples is presented in Table S3.

**Table S2: Descriptive statistics of sampling site variables**

| Variable                      | Frequency   | Percent   |
|-------------------------------|-------------|-----------|
| <b>Water Flow<sup>§</sup></b> |             |           |
| Still or Slow                 | 83.0        | 77.6%     |
| Medium                        | 18.0        | 16.8%     |
| Fast                          | 6.0         | 5.6%      |
| <b>Location<sup>‡</sup></b>   |             |           |
| Rice Field                    | 22.0        | 20.4%     |
| Irrigation Ditch              | 51.0        | 47.2%     |
| Pond/Reservoir                | 31.0        | 28.7%     |
| Stream/River                  | 4.0         | 3.7%      |
|                               | <b>Mean</b> | <b>SD</b> |
| <b>Water Temperature (°C)</b> | 22.7        | 2.0       |
| <b>Air Temperature (°C)</b>   | 26.8        | 3.8       |
| <b>Depth (cm)</b>             | 35.4        | 59.7      |

§ Water flow data is missing for 3 observations

‡ Location data is missing for 2 observations

**Table S3: Descriptive statistics of sampling sites variables among positive and negative qPCR samples**

| <b>Variable</b>   | <b>Positive Samples<br/>(n=7)</b> |                | <b>Negative Samples<br/>(n=101)</b> |                |
|-------------------|-----------------------------------|----------------|-------------------------------------|----------------|
|                   | <b>Frequency</b>                  | <b>Percent</b> | <b>Frequency</b>                    | <b>Percent</b> |
| <i>Water Flow</i> |                                   |                |                                     |                |
| Still or Slow     | 5                                 | 71.4%          | 76                                  | 77.6%          |
| Medium            | 2                                 | 28.6%          | 16                                  | 16.3%          |
| Fast              | 0                                 | 0.0%           | 6                                   | 6.1%           |
| <i>Location</i>   |                                   |                |                                     |                |
| Rice Field        | 0                                 | 0.0%           | 22                                  | 22.2%          |
| Irrigation Ditch  | 4                                 | 57.1%          | 45                                  | 45.5%          |
| Pond/Reservoir    | 3                                 | 42.9%          | 28                                  | 28.3%          |
| Stream/River      | 0                                 | 0.0%           | 4                                   | 4.0%           |

‡ Water flow data is missing for 3 observations and location data is missing for 2 observations among negative values
