# Supplementary material
Source: PubMed Central journal article supplement (PMC3067307)
Supplement: supp_77_6_2192__3.pdf [file supp_77_6_2192__3.pdf]

**Supplemental Materials (3) to Worrell *et al.* Field Detection of *Schistosoma japonicum* Cercariae in Environmental Water Samples by Quantitative PCR.**

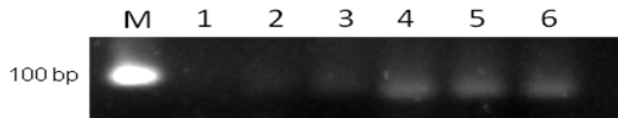

**Figure S1: Typical results of gel electrophoresis of qPCR products.** Quantitative PCR products were electrophoresed in a 2% agarose gel to visualize a 85 bp qPCR product. Quantitative PCR was run as described above using 5  $\mu$ L of DNA template equivalent to, 0.8 cercariae (Lane 2); 4 cercariae (Lane 3); 20 cercariae (Lane 4); 100 cercariae (Lane 5); 500 cercariae (Lane 6). Lane M represents the 100 bp band from our ladder and Lane 1 represents the negative template control.
